# Supplementary material for: Characterization of Aspergillus fumigatus Extracellular Vesicles and Their Effects on Macrophages and Neutrophils Functions
Source: PubMed Central journal article supplement (PMC6738167; doi:10.3389/fmicb.2019.02008), 2019-09-04
Supplement: Data_Sheet_1.pdf [file Data_Sheet_1.pdf]

## Supplementary Material

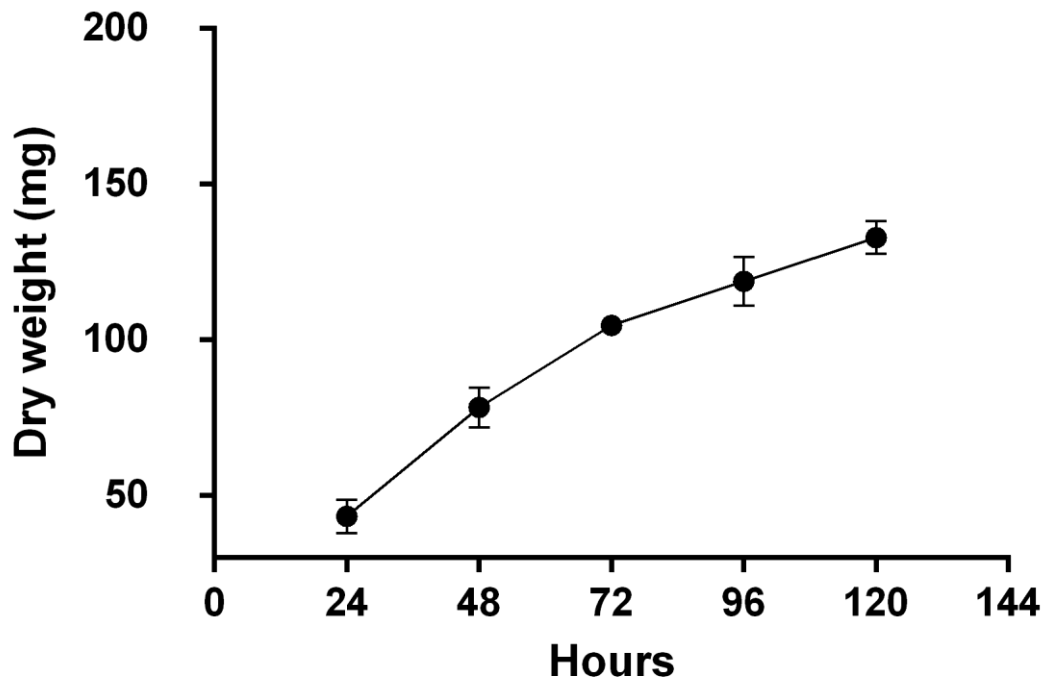

**Figure S1. Growth curve of *A. fumigatus* culture.**  $2 \times 10^8$  conidia/L of *A. fumigatus* A1163 were inoculated in 50 mL of complete YG at 37°C and dried fungal mass was analyzed after 24, 48, 72, 96 and 120 hours.

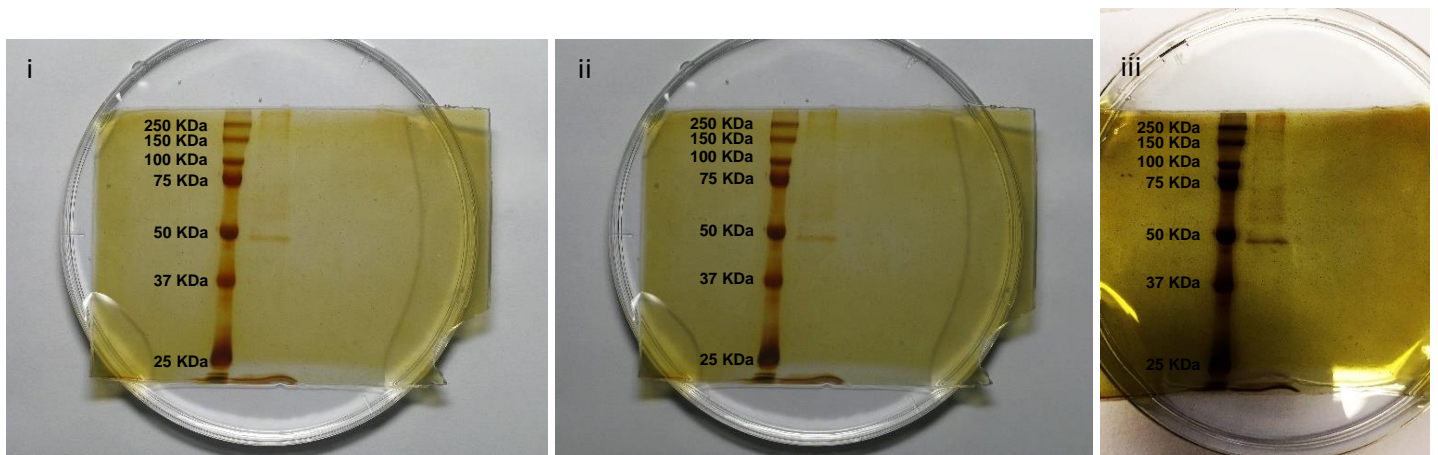

**Figure S2: Protein cargo from *A. fumigatus* EVs.** Protein content of vesicles was visualized by SDS-PAGE silver stained, according to materials and methods section. Images were acquired using MultiDoc-It Imaging System and Doc-It LS Image Acquisition Software (aperture 5.6; shutter 1/4). Figures i, ii and iii show different expositions from the same SDS-PAGE gel.

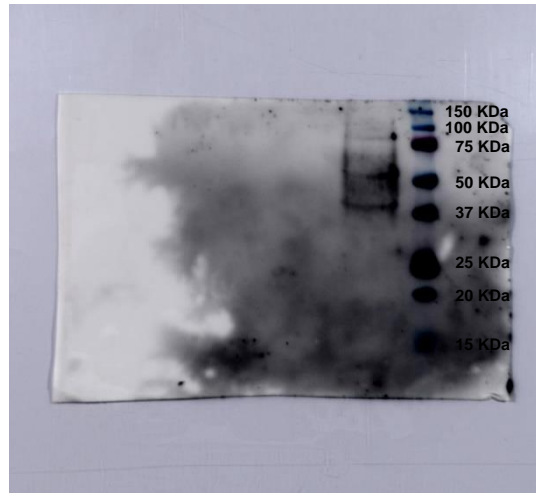

**Figure S3: Immunoreactive proteins from *A. fumigatus* vesicles.** Proteins from *A. fumigatus* EVs were transferred to nitrocellulose membrane and submitted to immunoblotting according to material and methods section. Total anti-serum from previously infected mice was able to identify some EVs proteins. The image was obtained using Amersham Imager 600 (GE).

**Table S1:** Proteins identified by proteomic analysis of *A. fumigatus* EVs and classified according to their localization and function.

| <b>Protein group number</b> | <b><i>A. fumigatus</i> genome database accession number</b> | <b>Protein name</b>                                    | <b>Localization</b>                                                                      | <b>Molecular Function</b>              | <b>Biological process</b>                                                                                                                                                                                                                            |
|-----------------------------|-------------------------------------------------------------|--------------------------------------------------------|------------------------------------------------------------------------------------------|----------------------------------------|------------------------------------------------------------------------------------------------------------------------------------------------------------------------------------------------------------------------------------------------------|
| 1                           | AFUB_063700                                                 | Glutamate dehydrogenase                                | extracellular region, cytosol, nucleus                                                   | oxidoreductase activity                | filamentous growth, cellular amino acid metabolic process                                                                                                                                                                                            |
| 2                           | AFUB_016770                                                 | Uncharacterized protein                                | unknown                                                                                  | hydrolase activity, peptidase activity | proteolysis                                                                                                                                                                                                                                          |
| 3                           | AFUB_063890                                                 | Ecm33                                                  | mitochondrion, membrane, cell wall, plasma membrane                                      | unknown                                | developmental process, cell cycle, response to chemical, sexual sporulation                                                                                                                                                                          |
| 4                           | AFUB_096050                                                 | Allergen Asp F3 (Peroxioredoxin family protein)        | extracellular region, cell wall, peroxisome                                              | oxidoreductase activity                | cellular catabolic process, cellular homeostasis, cellular response to oxidative stress, cofactor metabolic process, drug metabolic process, reactive oxygen species metabolic process, regulation of cellular process, response to toxic substance* |
| 5                           | AFUB_037910                                                 | Ubiquitin (UbiC), putative                             | extracellular region, cytosol, ribosome                                                  | structural molecule activity           | ribosome biogenesis, organelle organization, cellular protein modification process, translation, RNA metabolic process                                                                                                                               |
| 6                           | AFUB_015530                                                 | Extracellular cell wall glucanase Crf1/allergen Asp F9 | cell wall                                                                                | hydrolase activity                     | carbohydrate metabolic process                                                                                                                                                                                                                       |
| 7                           | AFUB_066130                                                 | Aminopeptidase                                         | extracellular region, cell wall, peroxisome, mitochondrion, endomembrane system, vacuole | hydrolase activity, peptidase activity | peptide catabolic process, proteolysis*                                                                                                                                                                                                              |
| 8                           | AFUB_094680                                                 | FAD/FMN-containing isoamyl alcohol oxidase MreA        | unknown                                                                                  | oxidoreductase activity                | oxidation-reduction process                                                                                                                                                                                                                          |
| 9                           | AFUB_094730                                                 | IgE-binding protein, putative                          | unknown                                                                                  | unknown                                | unknown                                                                                                                                                                                                                                              |

|    |             |                                            |                                                                  |                                             |                                                                                                                                                                                                               |
|----|-------------|--------------------------------------------|------------------------------------------------------------------|---------------------------------------------|---------------------------------------------------------------------------------------------------------------------------------------------------------------------------------------------------------------|
| 10 | AFUB_097210 | Carboxypeptidase                           | extracellular region                                             | peptidase activity,<br>hydrolase activity   | protein catabolic process, regulation of<br>biological process, conjugation                                                                                                                                   |
| 11 | AFUB_095500 | GPI anchored protein,<br>putative          | cell wall                                                        | unknown                                     | unknown                                                                                                                                                                                                       |
| 12 | AFUB_005920 | Glycogenin                                 | cytoplasm*                                                       | transferase activity                        | carbohydrate metabolic process                                                                                                                                                                                |
| 13 | AFUB_002680 | Uncharacterized protein                    | unknown                                                          | unknown<br>Carbohydrate binding             | unknown                                                                                                                                                                                                       |
| 14 | AFUB_099560 | Tripeptidyl-peptidase<br>(TppA), putative  | unknown                                                          | hydrolase activity,<br>peptidase activity   | proteolysis                                                                                                                                                                                                   |
| 15 | AFUB_004489 | FG-GAP repeat protein,<br>putative         | unknown                                                          | unknown                                     | unknown                                                                                                                                                                                                       |
| 16 | AFUB_045170 | Cell wall protein phiA                     | extracellular region                                             | unknown                                     | developmental process, cell cycle, sexual<br>sporulation                                                                                                                                                      |
| 17 | AFUB_048140 | Extracellular phytase,<br>putative         | extracellular region                                             | hydrolase activity,<br>phosphatase activity | unknown                                                                                                                                                                                                       |
| 18 | AFUB_020900 | Allergen Asp F4                            | extracellular region                                             | IgE binding                                 | unknown                                                                                                                                                                                                       |
| 19 | AFUB_022370 | 1,3-beta-<br>glucanosyltransferase<br>gel4 | extracellular region, cell<br>wall, membrane, plasma<br>membrane | transferase activity                        | carbohydrate metabolic process                                                                                                                                                                                |
| 20 | AFUB_052010 | Nucleoside diphosphate<br>kinase           | extracellular region,<br>cytosol, mitochondrion                  | transferase activity                        | response to stress, filamentous growth, cellular<br>protein modification process                                                                                                                              |
| 21 | AFUB_052060 | Thioredoxin reductase,<br>putative         | extracellular region                                             | oxidoreductase activity                     | response to chemical, secondary metabolic<br>process, toxin metabolic process                                                                                                                                 |
| 22 | AFUB_052270 | Class III chitinase ChiA1                  | extracellular region, cell<br>wall, cellular bud neck*           | hydrolase activity                          | carbohydrate metabolic process                                                                                                                                                                                |
| 23 | AFUB_050860 | Major allergen Asp F1                      | unknown                                                          | hydrolase activity,<br>RNA binding          | regulation of biological process                                                                                                                                                                              |
| 24 | AFUB_052690 | Molecular chaperone<br>Mod-E/Hsp90         | cell wall, cytosol,<br>membrane, plasma<br>membrane              | hydrolase activity,<br>protein binding      | response to stress, response to chemical,<br>filamentous growth, regulation of biological<br>process, signal transduction, organelle<br>organization, protein folding, DNA metabolic<br>process, pathogenesis |
| 25 | AFUB_085650 | Endo-chitosanase                           | unknown                                                          | hydrolase activity                          | unknown                                                                                                                                                                                                       |

|    |             |                                                       |                                                                  |                                                                  |                                                                                                                                                               |
|----|-------------|-------------------------------------------------------|------------------------------------------------------------------|------------------------------------------------------------------|---------------------------------------------------------------------------------------------------------------------------------------------------------------|
| 26 | AFUB_046050 | Alpha,alpha-trehalose<br>glucohydrolase<br>TreA/Ath1  | extracellular region, cell<br>wall, vacuole                      | hydrolase activity                                               | carbohydrate metabolic process, response to<br>stress, response to chemical                                                                                   |
| 27 | AFUB_048180 | Probable glucan endo-<br>1,3-beta-glucosidase<br>eglC | cell surface/cell wall*                                          | hydrolase activity,<br>transferase activity                      | carbohydrate metabolic process                                                                                                                                |
| 28 | AFUB_047510 | Extracellular conserved<br>serine-rich protein        | unknown                                                          | unknown                                                          | unknown                                                                                                                                                       |
| 29 | AFUB_047560 | FAD-dependent<br>oxygenase, putative                  | extracellular region/cell<br>wall                                | oxidoreductase activity                                          | secondary metabolic process                                                                                                                                   |
| 30 | AFUB_037350 | Phosphoglucomutase<br>PgmA                            | cytosol*                                                         | isomerase activity                                               | carbohydrate metabolic process, cellular<br>homeostasis                                                                                                       |
| 31 | AFUB_050510 | BYS1 domain protein,<br>putative                      | unknown                                                          | unknown                                                          | unknown                                                                                                                                                       |
| 32 | AFUB_040810 | Aspartyl aminopeptidase                               | extracellular region,<br>vacuole                                 | hydrolase activity,<br>peptidase activity                        | response to chemical, protein folding                                                                                                                         |
| 33 | AFUB_010890 | 1,3-beta-<br>glucanosyltransferase<br>Bgt1            | extracellular region, cell<br>wall                               | hydrolase activity,<br>transferase activity                      | carbohydrate metabolic process, pathogenesis                                                                                                                  |
| 34 | AFUB_023440 | 60S ribosomal protein<br>L18                          | cytosolic large ribosomal<br>subunit*                            | structural constituent<br>of ribosome*                           | cytoplasmic translation*                                                                                                                                      |
| 35 | AFUB_018250 | 1,3-beta-<br>glucanosyltransferase<br>gel1            | extracellular region, cell<br>wall, membrane, plasma<br>membrane | transferase activity                                             | carbohydrate metabolic process, response to<br>chemical, developmental process, response to<br>stress, cell cycle, asexual sporulation, sexual<br>sporulation |
| 36 | AFUB_009540 | Adenosylhomocysteinase                                | extracellular region                                             | hydrolase activity                                               | lipid metabolic process, cellular amino acid<br>metabolic process                                                                                             |
| 37 | AFUB_066060 | GPI anchored cell wall<br>protein, putative           | unknown                                                          | unknown                                                          | unknown                                                                                                                                                       |
| 38 | AFUB_087520 | Isoamyl alcohol oxidase,<br>putative                  | unknown                                                          | oxidoreductase activity                                          | oxidation-reduction process                                                                                                                                   |
| 39 | AFUB_006000 | 40S ribosomal protein<br>S3, putative                 | extracellular region,<br>cytosol, ribosome                       | RNA binding, protein<br>binding, structural<br>molecule activity | transport, ribosome biogenesis, translation                                                                                                                   |

|    |             |                                                    |                                                                                                  |                                                       |                                                                                                                                                                                                                                  |
|----|-------------|----------------------------------------------------|--------------------------------------------------------------------------------------------------|-------------------------------------------------------|----------------------------------------------------------------------------------------------------------------------------------------------------------------------------------------------------------------------------------|
| 40 | AFUB_004410 | Ubiquitin UbiA, putative                           | extracellular region, cytosol, ribosome, membrane                                                | structural molecule activity                          | transport, ribosome biogenesis, translation, organelle organization, cellular protein modification process                                                                                                                       |
| 41 | AFUB_079620 | Uncharacterized protein                            | extracellular region                                                                             | oxidoreductase activity                               | oxidation-reduction process                                                                                                                                                                                                      |
| 42 | AFUB_050490 | Glyceraldehyde-3-phosphate dehydrogenase           | extracellular region, cytosol, membrane, cell wall, peroxisome, mitochondrion, plasma membrane   | RNA binding, oxidoreductase activity, protein binding | carbohydrate metabolic process, transport, regulation of biological process, cell adhesion                                                                                                                                       |
| 43 | AFUB_023550 | Probable Xaa-Pro aminopeptidase pepP               | cytoplasm*                                                                                       | peptidase activity, hydrolase activity                | cellular process                                                                                                                                                                                                                 |
| 44 | AFUB_005160 | Probable NAD(P)H-dependent D-xylose reductase xyl1 | extracellular region                                                                             | RNA binding, oxidoreductase activity                  | carbohydrate metabolic process, response to stress, response to chemical                                                                                                                                                         |
| 45 | AFUB_036480 | Putative UDP-galactopyranose mutase                | extracellular region, cell wall                                                                  | isomerase activity                                    | carbohydrate metabolic process, filamentous growth                                                                                                                                                                               |
| 46 | AFUB_034560 | Uncharacterized protein                            | unkown                                                                                           | unknown                                               | unknown                                                                                                                                                                                                                          |
| 47 | AFUB_093550 | Actin Act1                                         | peroxisome, cytoskeleton, site polarized growth, action cytoskeleton                             | structural molecule activity*                         | cell cycle, endocytosis, exocytosis, intracellular protein transport*                                                                                                                                                            |
| 48 | AFUB_021670 | ER Hsp70 chaperone BiP, putative                   | extracellular region, membrane, nucleus, endoplasmic reticulum, cell cortex, endomembrane system | hydrolase activity, protein binding                   | transport, regulation of biological process, carbohydrate metabolic process, response to chemical, organelle organization, protein catabolic process, response to stress, signal transduction, conjugation, nucleus organization |
| 49 | AFUB_006770 | Elongation factor 1-alpha                          | extracellular region, mitochondrion, membrane, vacuole                                           | hydrolase activity, RNA binding                       | transport, translation, organelle organization, cytoskeleton organization                                                                                                                                                        |
| 50 | AFUB_056780 | Superoxide dismutase [Cu-Zn]                       | extracellular region, cell wall, mitochondrion, cytosol, nucleus                                 | protein binding, oxidoreductase activity              | regulation of biological process, response to chemical, response to stress, lipid metabolic process, filamentous growth, developmental process, cellular homeostasis, pathogenesis                                               |

|    |             |                                                  |                                                                                                      |                                                         |                                                                                                                                       |
|----|-------------|--------------------------------------------------|------------------------------------------------------------------------------------------------------|---------------------------------------------------------|---------------------------------------------------------------------------------------------------------------------------------------|
| 51 | AFUB_007770 | Molecular chaperone Hsp70                        | extracellular region, cell wall, mitochondrion, membrane, cytosol, nucleus, vacuole, plasma membrane | protein binding, RNA binding                            | transport, regulation of biological process, response to chemical, organelle organization, protein catabolic process, protein folding |
| 52 | AFUB_009760 | Phosphoglycerate kinase                          | extracellular region, cell wall, mitochondrion, membrane, plasma membrane                            | transferase activity                                    | regulation of biological process, carbohydrate metabolic process                                                                      |
| 53 | AFUB_036860 | 60S ribosomal protein L22, putative              | ribosome                                                                                             | structural molecule activity                            | translation                                                                                                                           |
| 54 | AFUB_025910 | 60S acidic ribosomal protein P2/allergen Asp F 8 | cytosol, ribosome                                                                                    | structural molecule activity, enzyme regulator activity | regulation of biological process, translation                                                                                         |
| 55 | AFUB_017890 | Purine nucleoside permease, putative             | unknown                                                                                              | transporter activity                                    | transport                                                                                                                             |
| 56 | AFUB_000660 | CFEM domain protein                              | cell wall                                                                                            | unknown                                                 | unknown                                                                                                                               |
| 57 | AFUB_089500 | Uncharacterized protein                          | unknown                                                                                              | unknown                                                 | unknown                                                                                                                               |
| 58 | AFUB_070900 | Uncharacterized protein                          | unknown                                                                                              | unknown                                                 | unknown                                                                                                                               |
| 59 | AFUB_024920 | Dipeptidyl-peptidase 5                           | cytosol, nucleus*                                                                                    | hydrolase activity, peptidase activity                  | proteolysis                                                                                                                           |
| 60 | AFUB_001190 | Ribosomal protein S13p/S18e                      | extracellular region, ribosome                                                                       | structural molecule activity, RNA binding               | transport, translation, ribosome biogenesis, RNA metabolic process                                                                    |

\* represents classification according to, at least, 50% of identity with *Neurospora crassa*, *Sacchamomyces cerevisiae* or *Schizosaccharomyces pombe*.
